# Supplementary material
Source: MDPI journal article supplement (https://www.mdpi.com/2673-6284/12/1/3)
Supplement: s1 [file s1]

## Article

# Molecular and Physiological Variability in Bread Wheat and Its Wild Relative (*Aegilops tauschii* Coss.) Species under Water-Deficit Stress Conditions

Zahra Khodadadi, Mansoor Omid , Alireza Etminan, Asa Ebrahimi and Alireza Pour-Aboughadareh

**Table S1.** The passport of the 95 investigated *Ae. tauschii* and *T. aestivum* accessions.

| No. | Gene bank codes | Species            | No. | Gene bank codes | Species             | No. | Gene bank codes | Species             |
|-----|-----------------|--------------------|-----|-----------------|---------------------|-----|-----------------|---------------------|
| 1   | IUGB-00133      | <i>T. aestivum</i> | 33  | IUGB-00578      | <i>T. aestivum</i>  | 65  | IUGB-00366      | <i>Ae. tauschii</i> |
| 2   | IUGB-00134      | <i>T. aestivum</i> | 34  | IUGB-00602      | <i>T. aestivum</i>  | 66  | IUGB-00369      | <i>Ae. tauschii</i> |
| 3   | IUGB-00264      | <i>T. aestivum</i> | 35  | IUGB-00586      | <i>T. aestivum</i>  | 67  | IUGB-00402      | <i>Ae. tauschii</i> |
| 4   | IUGB-00447      | <i>T. aestivum</i> | 36  | IUGB-00598      | <i>T. aestivum</i>  | 68  | IUGB-00151      | <i>Ae. tauschii</i> |
| 5   | IUGB-00453      | <i>T. aestivum</i> | 37  | IUGB-00515      | <i>T. aestivum</i>  | 69  | IUGB-00291      | <i>Ae. tauschii</i> |
| 6   | IUGB-00460      | <i>T. aestivum</i> | 38  | IUGB-01847      | <i>T. aestivum</i>  | 70  | IUGB-00382      | <i>Ae. tauschii</i> |
| 7   | IUGB-00480      | <i>T. aestivum</i> | 39  | IUGB-00534      | <i>T. aestivum</i>  | 71  | IUGB-00238      | <i>Ae. tauschii</i> |
| 8   | IUGB-00482      | <i>T. aestivum</i> | 40  | IUGB-00613      | <i>T. aestivum</i>  | 72  | IUGB-00249      | <i>Ae. tauschii</i> |
| 9   | IUGB-00485      | <i>T. aestivum</i> | 41  | IUGB-00590      | <i>T. aestivum</i>  | 73  | IUGB-00367      | <i>Ae. tauschii</i> |
| 10  | IUGB-00516      | <i>T. aestivum</i> | 42  | IUGB-00606      | <i>T. aestivum</i>  | 74  | IUGB-00273      | <i>Ae. tauschii</i> |
| 11  | IUGB-00911      | <i>T. aestivum</i> | 43  | IUGB-00599      | <i>T. aestivum</i>  | 75  | IUGB-00274      | <i>Ae. tauschii</i> |
| 12  | IUGB-01569      | <i>T. aestivum</i> | 44  | IUGB-01840      | <i>T. aestivum</i>  | 76  | IUGB-00276      | <i>Ae. tauschii</i> |
| 13  | IUGB-01635      | <i>T. aestivum</i> | 45  | IUGB-00532      | <i>T. aestivum</i>  | 77  | IUGB-00279      | <i>Ae. tauschii</i> |
| 14  | IUGB-01671      | <i>T. aestivum</i> | 46  | IUGB-00580      | <i>T. aestivum</i>  | 78  | IUGB-00289      | <i>Ae. tauschii</i> |
| 15  | IUGB-01695      | <i>T. aestivum</i> | 47  | 7499-2          | <i>T. aestivum</i>  | 79  | IUGB-00374      | <i>Ae. tauschii</i> |
| 16  | IUGB-01696      | <i>T. aestivum</i> | 48  | TN-01-0836      | <i>Ae. tauschii</i> | 80  | IUGB-00383      | <i>Ae. tauschii</i> |
| 17  | IUGB-00615      | <i>T. aestivum</i> | 49  | IUGB-00020      | <i>Ae. tauschii</i> | 81  | IUGB-00386      | <i>Ae. tauschii</i> |
| 18  | IUGB-00597      | <i>T. aestivum</i> | 50  | IUGB-00107      | <i>Ae. tauschii</i> | 82  | IUGB-00396      | <i>Ae. tauschii</i> |
| 19  | IUGB-00604      | <i>T. aestivum</i> | 51  | IUGB-00164      | <i>Ae. tauschii</i> | 83  | IUGB-00400      | <i>Ae. tauschii</i> |
| 20  | IUGB-00603      | <i>T. aestivum</i> | 52  | IUGB-00193      | <i>Ae. tauschii</i> | 84  | IUGB-00401      | <i>Ae. tauschii</i> |
| 21  | IUGB-00576      | <i>T. aestivum</i> | 53  | IUGB-00196      | <i>Ae. tauschii</i> | 85  | IUGB-00404      | <i>Ae. tauschii</i> |
| 22  | IUGB-00618      | <i>T. aestivum</i> | 54  | IUGB-00198      | <i>Ae. tauschii</i> | 86  | IUGB-00405      | <i>Ae. tauschii</i> |
| 23  | IUGB-01845      | <i>T. aestivum</i> | 55  | IUGB-00039      | <i>Ae. tauschii</i> | 87  | TN-01-1970      | <i>Ae. tauschii</i> |
| 24  | IUGB-00518      | <i>T. aestivum</i> | 56  | IUGB-00223      | <i>Ae. tauschii</i> | 88  | TN-01-2120      | <i>Ae. tauschii</i> |
| 25  | IUGB-00593      | <i>T. aestivum</i> | 57  | IUGB-00224      | <i>Ae. tauschii</i> | 89  | IUGB-00297      | <i>Ae. tauschii</i> |
| 26  | IUGB-00570      | <i>T. aestivum</i> | 58  | IUGB-00245      | <i>Ae. tauschii</i> | 90  | IUGB-01746      | <i>Ae. tauschii</i> |
| 27  | IUGB-00575      | <i>T. aestivum</i> | 59  | IUGB-00247      | <i>Ae. tauschii</i> | 91  | KC-50006        | <i>Ae. tauschii</i> |
| 28  | IUGB-01846      | <i>T. aestivum</i> | 60  | IUGB-00260      | <i>Ae. tauschii</i> | 92  | KC-50084        | <i>Ae. tauschii</i> |
| 29  | IUGBI-00577     | <i>T. aestivum</i> | 61  | IUGB-00261      | <i>Ae. tauschii</i> | 93  | TN-01-0312      | <i>Ae. tauschii</i> |
| 30  | IUGBI-00589     | <i>T. aestivum</i> | 62  | IUGB-00143      | <i>Ae. tauschii</i> | 94  | TN-01-1559      | <i>Ae. tauschii</i> |
| 31  | IUGB-00573      | <i>T. aestivum</i> | 63  | IUGB-00325      | <i>Ae. tauschii</i> | 95  | IUGB-00141      | <i>Ae. tauschii</i> |
| 32  | IUGB-00600      | <i>T. aestivum</i> | 64  | IUGB-00365      | <i>Ae. tauschii</i> |     |                 |                     |
